# Supplementary material for: Recent advances on the removal of dyes from wastewater using various adsorbents: a critical review
Source: Royal Society of Chemistry journal article supplement (doi:10.1039/d1ma00354b), 2021-01-01
Supplement: d1ma00354b1.pdf [file d1ma00354b1.pdf]

*Electronic supplementary information*

**Recent advances on the removal of dyes from wastewater using  
various adsorbents: A critical review**

Soumi Dutta <sup>a</sup>, Bramha Gupta <sup>a</sup>, Suneel Kumar Srivastava <sup>b\*</sup>, Ashok Kumar Gupta <sup>c\*</sup>

<sup>a</sup> School of Water Resources, Indian Institute of Technology Kharagpur, Kharagpur 721302,

India

<sup>b</sup> Department of Chemistry, Indian Institute of Technology Kharagpur, Kharagpur–721302, India

<sup>c</sup> Environmental Engineering Division, Department of Civil Engineering, Indian Institute of

Technology Kharagpur, Kharagpur 721302, India

\*Corresponding authors:

[sunil111954@yahoo.co.uk](mailto:sunil111954@yahoo.co.uk) (S.K. Srivastava), [agupta@civil.iitkgp.ac.in](mailto:agupta@civil.iitkgp.ac.in) (A.K. Gupta)

**Section A.** Scopus is one of the most widely used databases in retrieval. Data were retrieved from the online databases of Scopus on 24th December 2020. Articles that come under the title or keywords or abstract containing the words ‘Dye Removal’ were considered (Fig. 1). The search was limited to articles published in ‘All years’, and the document type was ‘articles’ only.

**Section B.** Scopus is one of the most widely used databases in retrieval. Data were retrieved from the online databases of Scopus on 17th March 2021. Articles that come under the title or keywords or abstract containing the words “Dye, Water, Treatment, Coagulation, Flocculation” OR “Dye, Water, Treatment, Adsorption” OR “Dye, Water, Treatment, Reverse Osmosis” OR “Dye, Water, Treatment, Microfiltration” OR “Dye, Water, Treatment, Nanofiltration”, OR “Dye, Water, Treatment, Photocatalysis” OR “Dye, Water, Treatment, Fenton” OR “Dye, Water, Treatment, UV/H<sub>2</sub>O<sub>2</sub>” OR “Dye, Water, Treatment, Ozonation” OR “Dye, Water, Treatment, Activated Sludge Process” OR “Dye, Water, Treatment, Membrane Bioreactor” OR “Dye, Water, Treatment, Sequencing Batch Reactor” were considered (Fig. 3a). The search was limited to articles published in ‘All years’, and the document type was ‘articles’ only.

**Section C.** Scopus is one of the most widely used databases in retrieval. Data were retrieved from the online databases of Scopus on 28th January 2021. Articles that come under the title or keywords or abstract containing the words “Dye, Water, Adsorption, Activated Carbon” OR “Dye, Water, Adsorption, Bioadsorbent” OR “Dye, Water, Adsorption, Fly ash” OR “Dye, Water, Adsorption, Nanocomposite” OR “Dye, Water, Adsorption, Metal-organic framework” OR “Dye, Water, Adsorption, Polymer” OR “Dye, Water, Adsorption, Metal oxide” OR “Dye, Water, Adsorption, Graphene oxide” OR “Dye, Water, Adsorption, Adsorbent” were considered. The

number of articles for “others” was obtained by deducting the summation of the number of articles coming under the keywords shown in Fig. 3b from the number of articles coming from keywords “Dye, Water, Adsorption, Adsorbent”. The search was limited to articles published in ‘All years’, and the document type was ‘articles’ only.
